# Supplementary material
Source: HighWire-hosted journal article supplement (http://www.qdcxjkg.com/highwire/filestream/113786/field_highwire_adjunct_files/4/Web_appendix_5_-_Contacts_of_Foreign_born_IPs.pdf)
Supplement: Web_appendix_5_-_Contacts_of_Foreign_born_IPs.pdf [file Web_appendix_5_-_Contacts_of_Foreign_born_IPs.pdf]

## 5. Prevalence of LTBI among contacts of foreign and locally born index patients in high-income countries

| Country of origin      | Included studies | Contacts with LTBI | Contacts screened | Proportion (%) | 95% CI (%)   | $\tau^2$ | $I^2$ | Odds ratio (95% CI)   | p-value |
|------------------------|------------------|--------------------|-------------------|----------------|--------------|----------|-------|-----------------------|---------|
| Contacts born locally  | 5                | 1,826              | 7,065             | 25.2%          | 19.6 – 31.8% | 0.11     | 93.4  | 1.0                   | --      |
| Contacts born overseas | 5                | 4,112              | 9,478             | 43.0%          | 38.2 – 48.0% | 0.04     | 89.8  | 2.23<br>(2.08 – 2.38) | <0.0001 |

Study references:[1,2,3,4,5,6] CI = confidence intervals.

### References:

1. Behr MA, Hopewell PC, Paz EA, Kawamura LM, Schechter GF, et al. (1998) Predictive value of contact investigation for identifying recent transmission of Mycobacterium tuberculosis. American Journal of Respiratory and Critical Care Medicine 158: 465-469.
2. CCDR (2006) Tuberculin skin testing of close contacts: recent or long-standing infection? Can Commun Dis Rep 32: 133-140.
3. Cauthen GM, Dooley SW, Onorato IM, Ihle WW, Burr JM, et al. (1996) Transmission of Mycobacterium tuberculosis from tuberculosis patients with HIV infection or AIDS. Am J Epidemiol 144: 69-77.
4. Golub J, Bur S, Cronin WA, Gange S, Baruch N, et al. (2006) Delayed tuberculosis diagnosis and tuberculosis transmission. International Journal of Tuberculosis and Lung Disease 10: 24-30.
5. Mixides G, Shende V, Teeter LD, Awe R, Musser JM, et al. (2005) Number of negative acid-fast smears needed to adequately assess infectivity of patients with pulmonary tuberculosis. Chest 128: 108-115.
6. Wells CD, Zuber PL, Nolan CM, Binkin NJ, Goldberg SV (1997) Tuberculosis prevention among foreign-born persons in Seattle--King County, Washington. Am J Respir Crit Care Med 156: 573-577.
